# Supplementary material
Source: PubMed Central journal article supplement (PMC4364231)
Supplement: pnas.201420955SI.pdf [file pnas.201420955SI.pdf]

# Supporting Information

Londin et al. 10.1073/pnas.1420955112

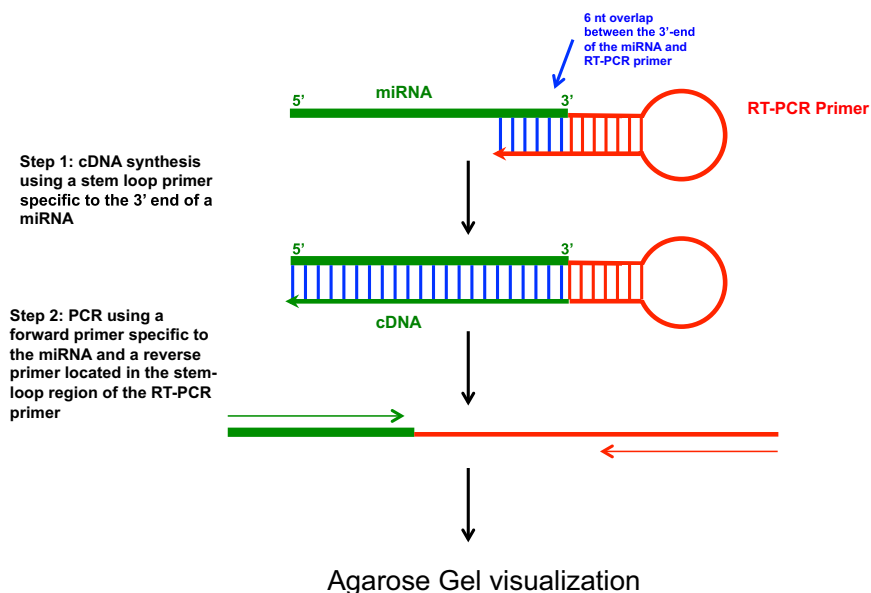

**Fig. S1.** PCR schematic for amplification of novel miRNAs. cDNA synthesis occurs using a stem-loop primer specific to the 3' end of a miRNA with a 6 nt overlap between the between miRNAs and RT-PCR primer. The PCR is carried out using a forward primer specific to the miRNA and a reverse primer specific to the stem-loop region of the RT-PCR primer. The resulting output is visualized on an agarose gel.

**Table S1. Among the novel miRNAs are seed-paralogues of "popular" miRNAs**

| Seed   | Known miRNAs sharing seed |                                                                         | Novel miRNAs that are seed-paralogues |                                                                                                                                                                                                                                                                            |
|--------|---------------------------|-------------------------------------------------------------------------|---------------------------------------|----------------------------------------------------------------------------------------------------------------------------------------------------------------------------------------------------------------------------------------------------------------------------|
|        | How many?                 | Name                                                                    | How many?                             | Name                                                                                                                                                                                                                                                                       |
| AAAGTG | 3                         | miR-17-5p<br>miR-20b-5p<br>miR-20a-5p                                   | 1                                     | TJU_CMC_MD2.ID02276.3p-miR                                                                                                                                                                                                                                                 |
| AACACT | 1                         | miR-200a-3p                                                             | 1                                     | TJU_CMC_MD2.ID00971.5p-miR                                                                                                                                                                                                                                                 |
| AATCAC | 1                         | miR-34b-3p                                                              | 1                                     | TJU_CMC_MD2.ID03005.3p-miR                                                                                                                                                                                                                                                 |
| ACCCTG | 2                         | miR-10b-5p<br>miR-10a-5p                                                | 3                                     | TJU_CMC_MD2.ID00662.3p-miR<br>TJU_CMC_MD2.ID00574.5p-miR<br>TJU_CMC_MD2.ID01550.3p-miR                                                                                                                                                                                     |
| AGCACC | 1                         | miR-29a-3p                                                              | 2                                     | TJU_CMC_MD2.ID02353.3p-miR<br>TJU_CMC_MD2.ID00524.3p-miR                                                                                                                                                                                                                   |
| AGCAGC | 3                         | miR-16-5p<br>miR-15b-5p<br>miR-15a-5p                                   | 9                                     | TJU_CMC_MD2.ID03212.5p-miR<br>TJU_CMC_MD2.ID01415.3p-miR<br>TJU_CMC_MD2.ID03136.3p-miR<br>TJU_CMC_MD2.ID00069.3p-miR<br>TJU_CMC_MD2.ID00807.5p-miR<br>TJU_CMC_MD2.ID01398.3p-miR<br>TJU_CMC_MD2.ID01521.3p-miR<br>TJU_CMC_MD2.ID00930.3p-miR<br>TJU_CMC_MD2.ID01325.3p-miR |
| AGCTTA | 2                         | miR-21-5p<br>miR-590-5p                                                 | 3                                     | TJU_CMC_MD2.ID02864.5p-miR<br>TJU_CMC_MD2.ID03495.5p-miR<br>TJU_CMC_MD2.ID01413.3p-miR                                                                                                                                                                                     |
| AGGCAG | 1                         | miR-34b-5p                                                              | 5                                     | TJU_CMC_MD2.ID02203.5p-miR<br>TJU_CMC_MD2.ID02387.5p-miR<br>TJU_CMC_MD2.ID01241.3p-miR<br>TJU_CMC_MD2.ID01229.3p-miR<br>TJU_CMC_MD2.ID03410.5p-miR                                                                                                                         |
| AGGCCA | 1                         | miR-15a-3p                                                              | 2                                     | TJU_CMC_MD2.ID01813.5p-miR<br>TJU_CMC_MD2.ID01250.3p-miR                                                                                                                                                                                                                   |
| ATCTTA | 1                         | miR-200a-5p                                                             | 1                                     | TJU_CMC_MD2.ID02273.3p-miR                                                                                                                                                                                                                                                 |
| ATTGCA | 2                         | miR-92a-3p<br>miR-92b-3p                                                | 1                                     | TJU_CMC_MD2.ID03303.3p-miR                                                                                                                                                                                                                                                 |
| CAATAT | 1                         | miR-16-2-3p                                                             | 1                                     | TJU_CMC_MD2.ID01975.3p-miR                                                                                                                                                                                                                                                 |
| CCCTGA | 5                         | miR-125a-5p<br>miR-125b-5p<br>miR-345-3p<br>miR-4319<br>miR-4732-3p     | 3                                     | TJU_CMC_MD2.ID01085.3p-miR<br>TJU_CMC_MD2.ID01576.3p-miR<br>TJU_CMC_MD2.ID02482.3p-miR                                                                                                                                                                                     |
| CTATTC | 2                         | miR-26a-1-3p<br>miR-26a-2-3p                                            | 1                                     | TJU_CMC_MD2.ID02575.3p-miR                                                                                                                                                                                                                                                 |
| CTGCAG | 1                         | miR-17-3p                                                               | 6                                     | TJU_CMC_MD2.ID02050.3p-miR<br>TJU_CMC_MD2.ID01376.5p-miR<br>TJU_CMC_MD2.ID03246.3p-miR<br>TJU_CMC_MD2.ID00085.3p-miR<br>TJU_CMC_MD2.ID02871.5p-miR<br>TJU_CMC_MD2.ID01424.5p-miR                                                                                           |
| CTGCCC | 1                         | miR-18a-3p                                                              | 6                                     | TJU_CMC_MD2.ID03302.3p-miR<br>TJU_CMC_MD2.ID00831.5p-miR<br>TJU_CMC_MD2.ID01696.3p-miR<br>TJU_CMC_MD2.ID02348.3p-miR<br>TJU_CMC_MD2.ID02192.5p-miR<br>TJU_CMC_MD2.ID03001.3p-miR                                                                                           |
| GAGGTA | 6                         | let-7a-5p<br>let-7f-5p<br>let-7g-5p<br>let-7b-5p<br>let-7e-5p let-7d-5p | 1                                     | TJU_CMC_MD2.ID00832.5p-miR                                                                                                                                                                                                                                                 |

**Table S1. Cont.**

| Seed   | Known miRNAs sharing seed |                          | Novel miRNAs that are seed-paralogues |                                                                                                                                                    |
|--------|---------------------------|--------------------------|---------------------------------------|----------------------------------------------------------------------------------------------------------------------------------------------------|
|        | How many?                 | Name                     | How many?                             | Name                                                                                                                                               |
| GCAGCA | 2                         | miR-103a-3p<br>miR-107   | 5                                     | TJU_CMC_MD2.ID02151.5p-miR<br>TJU_CMC_MD2.ID00091.5p-miR<br>TJU_CMC_MD2.ID00676.3p-miR<br>TJU_CMC_MD2.ID01372.3p-miR<br>TJU_CMC_MD2.ID02652.5p-miR |
| GCTTCT | 1                         | miR-103a-2-5p            | 2                                     | TJU_CMC_MD2.ID00400.5p-miR<br>TJU_CMC_MD2.ID02736.5p-miR                                                                                           |
| GGCAGT | 2                         | miR-34c-5p<br>miR-34a-5p | 4                                     | TJU_CMC_MD2.ID00706.5p-miR<br>TJU_CMC_MD2.ID02205.5p-miR<br>TJU_CMC_MD2.ID01026.3p-miR<br>TJU_CMC_MD2.ID01982.5p-miR                               |
| GGTTGG | 1                         | miR-92a-1-5p             | 4                                     | TJU_CMC_MD2.ID01723.5p-miR<br>TJU_CMC_MD2.ID00051.3p-miR<br>TJU_CMC_MD2.ID00293.3p-miR<br>TJU_CMC_MD2.ID03385.3p-miR                               |
| GTGCAA | 1                         | miR-19b-3p               | 2                                     | TJU_CMC_MD2.ID03086.5p-miR<br>TJU_CMC_MD2.ID00745.5p-miR                                                                                           |
| TCCTAC | 1                         | miR-155-3p               | 2                                     | TJU_CMC_MD2.ID02078.5p-miR<br>TJU_CMC_MD2.ID01758.3p-miR                                                                                           |

The table lists alphabetically the seeds contained in the mature miRNAs of several precursors that are frequently cited in the literature. For each seed, we show the known mature miRNA(s) containing the seed and the identifiers of the seed-paralogues among the newly discovered miRNAs. It is worth noting that a few of the shown miRNAs each have several seed-paralogues among the newly discovered miRNAs.

**Table S2. Precursor/mature conservation for a less stringent threshold**

| Genome where present | No. of precursors:mature combinations | No. of precursors:mature combinations whose novel miRNAs have support in Ago CLIP-seq | No. of miRBase precursors:mature combinations |
|----------------------|---------------------------------------|---------------------------------------------------------------------------------------|-----------------------------------------------|
| Human                | 3,707                                 | 1,657                                                                                 | 2,772                                         |
| Chimpanzee           | 1,310 (35.3%)                         | 558 (33.7%)                                                                           | 2,163 (78.0%)                                 |
| Gorilla              | 1,371 (37.0%)                         | 603 (36.4%)                                                                           | 2,334 (84.2%)                                 |
| Orangutan            | 1,136 (30.6%)                         | 468 (28.2%)                                                                           | 2,005 (72.3%)                                 |
| Macaque              | 807 (21.8%)                           | 351 (21.2%)                                                                           | 1,881 (67.9%)                                 |
| Mouse                | 262 (7.1%)                            | 136 (8.2%)                                                                            | 778 (28.1%)                                   |
| <i>Drosophila</i>    | 103 (2.8%)                            | 44 (2.7%)                                                                             | 76 (2.7%)                                     |
| Worm                 | 81 (2.2%)                             | 36 (2.2%)                                                                             | 50 (1.8%)                                     |

In Table 2, we showed conservation results for searches that required the presence of at least 85% of the mature miRNA sequence (with 100% of the seed matching) and the presence of at least 85% of the precursor sequence. This table shows conservation results for searches that required the presence of at least 85% of the mature miRNA sequence (with 100% of the seed matching) and the presence of at least 50% of the precursor sequence: i.e., more tolerant than the setting in Table 2. The results are largely unchanged, with the great majority of the newly identified sequences remaining primate-specific.

**Table S3. GO terms for RNA22 predicted targets for four miRNAs**

| mir-19a-3p  | mir-19b-3p  | TJU_CMC_MD2.ID00745-5p | TJU_CMC_MD2.ID03086-5p | Term                                                    |
|-------------|-------------|------------------------|------------------------|---------------------------------------------------------|
| —           | —           | —                      | 2.405349619            | Negative regulation of protein-complex disassembly      |
| —           | —           | —                      | 2.354084708            | Regulation of protein-complex disassembly               |
| —           | —           | —                      | 1.878832007            | Microtubule-associated complex                          |
| —           | —           | 1.739631004            | 1.421497967            | Cell-projection organization                            |
| —           | —           | 1.798758987            | —                      | Dendrite                                                |
| —           | —           | 1.78423613             | —                      | Plasma-membrane part                                    |
| —           | —           | 1.570531031            | —                      | Protein-kinase activity                                 |
| 1.603993145 | 1.504485823 | —                      | —                      | Nucleoside-triphosphatase regulator activity            |
| 1.614881337 | 1.507646301 | —                      | —                      | GTPase regulator activity                               |
| 1.670034031 | 1.622729454 | —                      | —                      | Regulation of small GTPase-mediated signal transduction |
| 1.690154923 | 1.649222996 | —                      | —                      | Regulation of Ras protein signal transduction           |
| 1.740009706 | 1.626187051 | —                      | —                      | Small GTPase regulator activity                         |
| 1.947991476 | 1.963241996 | —                      | —                      | Guanyl-nucleotide exchange factor activity              |
| —           | 2.043923174 | —                      | —                      | Ras guanyl-nucleotide exchange factor activity          |
| —           | 2.099164341 | —                      | —                      | Rho guanyl-nucleotide exchange factor activity          |

All four of these miRNAs share the same seed sequence: GTGCAA. Cells marked by "—" indicate that the associated GO terms were not identified as being significant.

**Table S4. Primer sequences used for the miRNA PCR validations performed in Fig. 5**

| miRNA                              | miRNA sequence (5'→ 3')   | Length of miRNA | Primers for cDNA synthesis                                                                                                  | Primers for RT PCR    |
|------------------------------------|---------------------------|-----------------|-----------------------------------------------------------------------------------------------------------------------------|-----------------------|
| TJU_CMC_MD2.ID00126.5p-miR         | CTCAGGACTGGGTCATTCTGTT    | 22              | <span style="color: blue;">GTCGTATCCAGTGCAGGGTCCGAGGT-</span><br><span style="color: red;">ATTTCGCACTGGATACGACAACAGA</span> | CAGGACTGGGTCATTCTGTT  |
| TJU_CMC_MD2.ID00259.5p-miR         | AGCTACAGGTGAGATCAGGTTT    | 22              | <span style="color: blue;">GTCGTATCCAGTGCAGGGTCCGAGGT-</span><br><span style="color: red;">ATTTCGCACTGGATACGACAACCT</span>  | CTACAGGTGAGATCAGGTTT  |
| TJU_CMC_MD2.ID00400.5p-miR         | AGCTTCTTTACAGTGTTCCTTG    | 23              | <span style="color: blue;">GTCGTATCCAGTGCAGGGTCCGAGGT-</span><br><span style="color: red;">ATTTCGCACTGGATACGACCAAGGC</span> | TTCTTTACAGTGTTCCTTG   |
| TJU_CMC_MD2.ID00480.5p-miR         | GGCACTGACCACGTCACTGGAT    | 22              | <span style="color: blue;">GTCGTATCCAGTGCAGGGTCCGAGGT-</span><br><span style="color: red;">ATTTCGCACTGGATACGACATCCAG</span> | CACTGACCACGTCACTGGAT  |
| TJU_CMC_MD2.ID00841.3p-miR         | GCTAAAGGATATTTTGGGTTTCAGA | 24              | <span style="color: blue;">GTCGTATCCAGTGCAGGGTCCGAGGT-</span><br><span style="color: red;">ATTTCGCACTGGATACGACTCTGAA</span> | AAGGATATTTTGGGTTTCAGA |
| TJU_CMC_MD2.ID00851.5p-miR         | CCCAGTGCAGGAGCGGGTCC      | 20              | <span style="color: blue;">GTCGTATCCAGTGCAGGGTCCGAGGT-</span><br><span style="color: red;">ATTTCGCACTGGATACGACGGACCC</span> | CCCAGTGCAGGAGCGGGTCC  |
| TJU_CMC_MD2.ID01125.3p-miR         | CCATGCTGAGAATCGCTGTTC     | 21              | <span style="color: blue;">GTCGTATCCAGTGCAGGGTCCGAGGT-</span><br><span style="color: red;">ATTTCGCACTGGATACGACGAACAG</span> | CATGCTGAGAATCGCTGTTC  |
| TJU_CMC_MD2.ID01196.3p-miR         | GCACACAGTCCATTCCCTACT     | 22              | <span style="color: blue;">GTCGTATCCAGTGCAGGGTCCGAGGT-</span><br><span style="color: red;">ATTTCGCACTGGATACGACAGTAGG</span> | ACACAGTCCATTCCCTACT   |
| TJU_CMC_MD2.ID01548.5p-miR         | TGGCCAGGTAGAGGGTCCCGG     | 23              | <span style="color: blue;">GTCGTATCCAGTGCAGGGTCCGAGGT-</span><br><span style="color: red;">ATTTCGCACTGGATACGACCGCGGA</span> | CCCAGGTAGAGGGTCCCGG   |
| TJU_CMC_MD2.ID01613.5p-miR         | TCAAGTGATGGAGAGCAATA      | 20              | <span style="color: blue;">GTCGTATCCAGTGCAGGGTCCGAGGT-</span><br><span style="color: red;">ATTTCGCACTGGATACGACTATTGC</span> | TCAAGTGATGGAGAGCAATA  |
| TJU_CMC_MD2.ID01963.3p-miR         | CTAGAGAACCATCTGAAAGACT    | 22              | <span style="color: blue;">GTCGTATCCAGTGCAGGGTCCGAGGT-</span><br><span style="color: red;">ATTTCGCACTGGATACGACAGTCTT</span> | AGAGAACCATCTGAAAGACT  |
| TJU_CMC_MD2.ID02236.3p-miR         | GATGCTGGGAGTTGCGATCTGC    | 23              | <span style="color: blue;">GTCGTATCCAGTGCAGGGTCCGAGGT-</span><br><span style="color: red;">ATTTCGCACTGGATACGACGCAGAT</span> | GCCTGGGAGTTGCGATCTGC  |
| TJU_CMC_MD2.ID02236.5p-miR         | GACGAATTTTGGAGCGGGTAAA    | 22              | <span style="color: blue;">GTCGTATCCAGTGCAGGGTCCGAGGT-</span><br><span style="color: red;">ATTTCGCACTGGATACGACTTTACC</span> | CGAATTTTGGAGCGGGTAAA  |
| TJU_CMC_MD2.ID02704.5p-miR         | CGGGCTGGCTTTAGCTCAGCGGT   | 23              | <span style="color: blue;">GTCGTATCCAGTGCAGGGTCCGAGGT-</span><br><span style="color: red;">ATTTCGCACTGGATACGACACCGCT</span> | GCTGGCTTTAGCTCAGCGGT  |
| TJU_CMC_MD2.ID03061.3p-miR         | TACTCTCTCGGACAAGCTGTAG    | 22              | <span style="color: blue;">GTCGTATCCAGTGCAGGGTCCGAGGT-</span><br><span style="color: red;">ATTTCGCACTGGATACGACCTACAG</span> | CTCTCTCGGACAAGCTGTAG  |
| TJU_CMC_MD2.ID03061.5p-miR         | AATTACAGATTGTCTCAGAGA     | 21              | <span style="color: blue;">GTCGTATCCAGTGCAGGGTCCGAGGT-</span><br><span style="color: red;">ATTTCGCACTGGATACGACTCTCTG</span> | ATTACAGATTGTCTCAGAGA  |
| TJU_CMC_MD2.ID03327.3p-miR         | CTCACTGATCAATGAATGCAA     | 21              | <span style="color: blue;">GTCGTATCCAGTGCAGGGTCCGAGGT-</span><br><span style="color: red;">ATTTCGCACTGGATACGACTTGAT</span>  | TCACTGATCAATGAATGCAA  |
| TJU_CMC_MD2.ID03399.5p-miR         | TACGGTCAATGCTCTGAAATC     | 21              | <span style="color: blue;">GTCGTATCCAGTGCAGGGTCCGAGGT-</span><br><span style="color: red;">ATTTCGCACTGGATACGACGATTTT</span> | ACGGTCAATGCTCTGAAATC  |
| TJU_CMC_MD2.ID03403.5p-miR         | CGCCGCTCTCGGGCAGGGCC      | 23              | <span style="color: blue;">GTCGTATCCAGTGCAGGGTCCGAGGT-</span><br><span style="color: red;">ATTTCGCACTGGATACGACGGCCCT</span> | CGCCGCTCTCGGGCAGGGCC  |
| TJU_CMC_MD2.ID03495.5p-miR         | TAGCTTATCTCTGCAGCCTTGACA  | 24              | <span style="color: blue;">GTCGTATCCAGTGCAGGGTCCGAGGT-</span><br><span style="color: red;">ATTTCGCACTGGATACGACTGTCAA</span> | TTATCTCTGCAGCCTTGACA  |
| Reverse Primer in stem loop region | GTGCAGGGTCCGAGGT          |                 |                                                                                                                             |                       |

Red, the miRNA-specific region; blue, the stem-loop sequence.

## Other Supporting Information Files

- [Dataset S1 \(XLSX\)](#)
- [Dataset S2 \(XLSX\)](#)
- [Dataset S3 \(XLSX\)](#)
- [Dataset S4 \(XLSX\)](#)
- [Dataset S5 \(XLSX\)](#)
